# Supplementary material for: Identification of subtype recognition and prognosis model characterized by Antibody-dependent cell phagocytosis related genes in breast cancer
Source: Research Square preprint supplement (doi:10.21203/rs.3.rs-3243949/v1), 2023-08-15
Supplement: Supplementary file 1 [file 5d5fa2c8b0de7248b67214b3.xlsx]

## Sheet: supplymentary tableS1
	HR	HR.95L	HR.95H	pvalue
HMGB2	0.831969	0.702829	0.984838	0.0325586
SLA	0.790819	0.647352	0.966082	0.0215722
TMOD1	1.50721	1.26206	1.79997	5.9e-06
RAC2	0.754165	0.64737	0.878577	0.000292784
CNTFR	1.14709	1.04145	1.26345	0.00536967
PICALM	1.65604	1.21576	2.25575	0.00137922
RAP1GAP2	1.36674	1.11448	1.67611	0.00269049
NLRC3	0.694793	0.500818	0.963898	0.0292497
RHOH	0.829849	0.708077	0.972564	0.0212477
ARRDC3	1.22043	1.03885	1.43374	0.015362
MRPL40	0.726287	0.545719	0.966602	0.0283158
COX5B	0.700887	0.550878	0.891744	0.00382285
BCL9	0.776104	0.623647	0.965831	0.0231146
FOXO1	1.24991	1.04715	1.49194	0.0135071
GMDS	0.777015	0.623028	0.969061	0.0251658
NDUFB7	0.782	0.637455	0.95932	0.0183614
FBRS	0.681813	0.50235	0.925388	0.0139903
SHQ1	0.578817	0.398072	0.841631	0.00420111
IRF2	0.51843	0.365088	0.736178	0.000240792
TTC39C	0.657003	0.506432	0.852341	0.00156167
CS	1.77195	1.28618	2.44118	0.000466116
NDUFS1	1.57936	1.11803	2.23104	0.00951563
BLNK	0.741406	0.613139	0.896505	0.00202034
FDX1	1.33546	1.0461	1.70485	0.0202498
CLIC4	1.38916	1.12483	1.71561	0.00227104
FCRL3	0.709098	0.504372	0.996923	0.0479635
MAP3K3	1.60823	1.1983	2.1584	0.00155085
MUC1	0.885688	0.820767	0.955744	0.0017758
NFKB2	0.706014	0.560828	0.888785	0.00303965
MAML2	1.16261	1.01001	1.33827	0.0358443
ZEB2	1.43366	1.15945	1.77272	0.000881341
ZBTB16	1.2315	1.0568	1.43508	0.00763616
TLE3	0.661391	0.525073	0.833098	0.000447093
CCNT1	1.44267	1.04204	1.99733	0.0272378
DUSP22	1.36017	1.00696	1.83727	0.0449408
MRPL24	0.754978	0.61178	0.931695	0.00881131
CCDC88C	0.645075	0.508072	0.819021	0.000319503
ARID1B	1.73328	1.22261	2.45725	0.00201096
ZDBF2	1.4171	1.09894	1.82738	0.00720566
SSR4	0.761057	0.613356	0.944327	0.0131266
PARS2	0.649982	0.453831	0.930913	0.0187448
PDSS2	1.35071	1.05998	1.72118	0.0150592
HIC1	1.36147	1.03137	1.79722	0.0294051
CLIC2	1.22385	1.01917	1.46964	0.0305152
YPEL5	1.77613	1.14552	2.7539	0.0102557
IER5L	0.832154	0.698735	0.991049	0.0393211
VSIG8	2.53614	1.34242	4.79137	0.00414129
GFI1	0.632203	0.43834	0.911805	0.0141235
NANS	0.70391	0.550931	0.899368	0.0049802
KLHL36	1.60343	1.21939	2.10842	0.000725142
PTPN6	0.660856	0.526402	0.829652	0.000358264
SREBF1	0.824223	0.714025	0.951427	0.00829236
FKBP11	0.715664	0.563285	0.909265	0.00616989
ZNF746	0.600489	0.367604	0.980912	0.0416566
RUVBL1	0.683991	0.522938	0.894644	0.00555943
MAP1B	1.30154	1.11376	1.521	0.000915864
DEFB1	1.11759	1.03187	1.21042	0.00632068
TMEM147	0.66912	0.517793	0.864672	0.00212975
RABEP2	0.757964	0.615523	0.933368	0.00907501
FBXW7	1.45563	1.05056	2.01687	0.0240445
SORD	0.84692	0.722124	0.993282	0.0410682
RDX	1.43098	1.15891	1.76691	0.00086625
THSD7A	1.72689	1.25981	2.36715	0.000685377
PRKCD	0.730819	0.576981	0.925676	0.00931169
ZEB1	1.20855	1.00051	1.45985	0.0493872
SPIB	0.797788	0.653944	0.973272	0.0259448
GMIP	0.645754	0.495471	0.841619	0.00121348
PWWP2B	0.779874	0.629191	0.966643	0.0232274
BTBD19	1.70851	1.25565	2.32469	0.000652511
IRX5	0.823939	0.713134	0.95196	0.00858671
MLYCD	1.99608	1.20087	3.31788	0.00767598
CHAF1A	0.75228	0.588633	0.961422	0.0229482
VPS37C	0.700813	0.537741	0.913338	0.00851959
PCSK7	2.19301	1.4978	3.2109	5.42e-05
FOXO4	1.30674	1.03626	1.64782	0.0237617
PRDM1	0.778285	0.618891	0.97873	0.0320456
ITGB2	0.865206	0.750495	0.997451	0.0460289
FGD3	0.792909	0.702394	0.895088	0.000175382
SIAH2	0.68953	0.588302	0.808176	4.45e-06
SPTBN1	1.31047	1.11453	1.54084	0.00106674
RUNX1T1	1.76268	1.30175	2.38683	0.000247303
MYCBP2	1.25242	1.02365	1.53232	0.0287347
PMAIP1	0.81987	0.71403	0.941399	0.00485859
GDPGP1	0.365356	0.222585	0.599706	6.83e-05
PTPMT1	0.648665	0.454434	0.925913	0.0171297
DGKB	2.75777	1.07509	7.0741	0.0348066
EVL	0.804528	0.706876	0.91567	0.000986495
MS4A8	0.783184	0.618037	0.99246	0.0431138
BCLAF1	1.64288	1.15217	2.34259	0.00609907
HDGF	0.73471	0.586943	0.919679	0.00712801
VPS72	0.752821	0.572094	0.990639	0.042651
HAUS1	0.741109	0.573354	0.957947	0.0221337
NDUFAF3	0.715988	0.558852	0.917307	0.00822447
LCK	0.852525	0.731298	0.993848	0.0414678
SS18	0.633559	0.434424	0.923974	0.0177552
NDUFB4	0.746244	0.567436	0.981397	0.0362308
SIX4	0.736827	0.604187	0.898586	0.00256162
COPG1	0.629952	0.457518	0.867374	0.00462706
FEZ2	1.62255	1.13668	2.31611	0.00768696
CEACAM20	4.97113	1.14334	21.614	0.0324677
SEMA4A	0.806232	0.659263	0.985964	0.0359381
NACC2	1.39696	1.05857	1.84353	0.0181708
COX20	0.555171	0.384985	0.800589	0.00162857
CPLX2	1.18131	1.04435	1.33623	0.00804378
NDUFB10	0.731481	0.575783	0.929281	0.0104497
YBEY	0.682131	0.519556	0.895578	0.00588834
GSK3A	0.690231	0.478584	0.995476	0.0472299
DOCK11	1.29393	1.11705	1.49881	0.000590519
ZNF683	0.774168	0.627689	0.954829	0.0167614
SLC29A2	0.810766	0.662295	0.992522	0.0420829
TMEM101	0.827928	0.716306	0.956944	0.0106008
GNE	1.30276	1.05618	1.6069	0.0134923
IKZF3	0.805959	0.680335	0.954779	0.0125876
HIVEP2	1.38318	1.08509	1.76317	0.00880978
TNFRSF21	1.18815	1.02384	1.37884	0.0231963
C5AR1	1.21452	1.01424	1.45435	0.0345342
SYT1	0.889919	0.799914	0.990051	0.0320526
SLA2	0.78169	0.62404	0.979166	0.0321
CIT	0.691986	0.536726	0.892158	0.00450813
ARPC3	0.700956	0.506785	0.969522	0.0317936
MOSPD1	1.56007	1.09619	2.22026	0.0135094
SLC38A2	1.35771	1.04001	1.77246	0.024548
CD19	0.753038	0.586725	0.966494	0.0259059
SHOX	75.5417	3.76506	1515.66	0.00470708
ZCCHC14	1.59002	1.15134	2.19585	0.00486866
KDELR3	0.849498	0.726756	0.992971	0.0405051
ANAPC11	0.681078	0.548951	0.845006	0.00048217
ARHGEF1	0.690891	0.532749	0.895976	0.00530012
STUB1	0.79203	0.638111	0.983075	0.0344475
ELAVL1	0.566804	0.364174	0.882178	0.0118906

## Sheet: supplymentary tableS2
	logFC	AveExpr	t	P.Value	adj.P.Val	B	change
MAML2	-1.32894	2.20985	-28.2586	9.31692e-130	1.09748e-125	285.613	DOWN
CYRIA	-1.007	1.81146	-28.2568	9.5987e-130	1.09748e-125	285.584	DOWN
FMNL2	-1.14217	2.57971	-27.2476	7.51538e-123	6.44463e-119	269.772	DOWN
EGFR	-1.69027	2.01689	-26.8391	4.53026e-120	3.10785e-116	263.395	DOWN
RNF145	-1.1403	3.31825	-26.2194	7.26212e-116	4.15163e-112	253.751	DOWN
ACSL4	-1.05673	2.749	-25.4966	5.51845e-111	1.89288e-107	242.556	DOWN
TPRN	1.13683	2.77613	25.4585	9.9562e-111	3.10462e-107	241.968	UP
SMIM22	1.89401	4.13328	25.3256	7.79587e-110	2.22838e-106	239.918	UP
NCOA7	-1.2499	2.74525	-25.2429	2.80536e-109	7.40205e-106	238.643	DOWN
PIERCE1	1.20316	2.19603	24.2305	1.6519e-102	2.83309e-99	223.115	UP
PRNP	-1.23365	4.92054	-23.8205	8.70861e-100	1.35779e-96	216.872	DOWN
LRRC56	1.02661	1.90276	23.7626	2.10212e-99	3.13499e-96	215.994	UP
NME3	1.24996	4.79105	23.7441	2.79066e-99	3.98844e-96	215.712	UP
MRAS	-1.26096	2.69529	-23.6397	1.36709e-98	1.8757e-95	214.129	DOWN
MID1	-1.03226	1.24498	-23.4873	1.38774e-97	1.83081e-94	211.821	DOWN
SIGIRR	1.00886	3.52527	23.2641	4.09468e-96	5.01613e-93	208.45	UP
MET	-1.36759	2.08931	-23.1587	2.01961e-95	2.16483e-92	206.86	DOWN
CHST3	-1.12034	2.18148	-22.9583	4.17238e-94	4.08905e-91	203.844	DOWN
ZMYND10	1.32316	1.70892	22.9299	6.40278e-94	6.10061e-91	203.418	UP
DMD	-1.03682	1.00975	-22.6539	4.08077e-92	3.41401e-89	199.28	DOWN
NECAB3	1.028	3.17292	22.592	1.03395e-91	8.44415e-89	198.354	UP
FAM171A1	-1.32836	2.50812	-22.5309	2.58362e-91	2.01411e-88	197.442	DOWN
NFIB	-1.51843	3.31899	-22.4881	4.9066e-91	3.50627e-88	196.803	DOWN
FAT1	-1.31304	3.24922	-22.4648	6.95938e-91	4.87171e-88	196.455	DOWN
ANXA1	-1.4848	4.94117	-22.3794	2.49952e-90	1.71472e-87	195.181	DOWN
GAMT	1.47807	3.66967	22.3161	6.44078e-90	4.24856e-87	194.238	UP
DEGS2	1.90723	3.27363	22.2645	1.39436e-89	8.81886e-87	193.469	UP
KLHDC9	1.19448	2.48667	22.2635	1.41406e-89	8.81886e-87	193.455	UP
SFRP1	-2.93333	3.83187	-22.0353	4.25289e-88	2.43131e-85	190.065	DOWN
KCNJ11	1.28035	2.2491	21.8798	4.29328e-87	2.23127e-84	187.763	UP
SIRPA	-1.00149	3.5749	-21.8569	6.0309e-87	3.04215e-84	187.424	DOWN
RARA	1.1582	4.36937	21.6692	9.74223e-86	4.28421e-83	184.654	UP
C5AR2	1.1055	1.68374	21.6677	9.95501e-86	4.32236e-83	184.632	UP
CD2BP2-DT	1.02059	2.29194	21.5525	5.46795e-85	2.28727e-82	182.936	UP
RAB26	1.21763	1.85609	21.5492	5.73713e-85	2.37095e-82	182.888	UP
AMOTL1	-1.03095	2.45443	-21.5431	6.27877e-85	2.56391e-82	182.798	DOWN
TJP3	1.20458	3.53931	21.5268	7.99258e-85	3.22534e-82	182.558	UP
TRIM2	-1.22764	2.221	-21.5107	1.01406e-84	3.99808e-82	182.321	DOWN
RNF150	-1.01361	1.10418	-21.4053	4.79743e-84	1.82841e-81	180.773	DOWN
GATA3	2.16889	6.66471	21.3732	7.6996e-84	2.87069e-81	180.302	UP
PRR15	1.86835	3.48709	21.1599	1.76987e-82	6.07083e-80	177.18	UP
STARD10	1.545	5.14834	21.1566	1.85775e-82	6.30919e-80	177.132	UP
MLPH	1.98425	4.67926	21.1237	3.00653e-82	1.00123e-79	176.652	UP
PCP2	1.26198	1.74483	21.0848	5.31986e-82	1.72148e-79	176.084	UP
AGR3	3.08479	4.99429	21.0232	1.31036e-81	4.16174e-79	175.186	UP
CELF2	-1.00712	2.05762	-21.0174	1.4265e-81	4.48901e-79	175.102	DOWN
ESR1	2.41836	4.09962	20.8611	1.39921e-80	4.21004e-78	172.828	UP
ANXA9	1.50524	3.96036	20.8596	1.43055e-80	4.26689e-78	172.806	UP
GPM6B	-1.11738	1.82878	-20.7414	8.00638e-80	2.30779e-77	171.091	DOWN
KDM4B	1.03453	3.18117	20.6178	4.83359e-79	1.32638e-76	169.301	UP
PPM1J	1.03874	1.83467	20.6164	4.92879e-79	1.34177e-76	169.281	UP
PLA2G4A	-1.05051	1.39735	-20.6155	4.99971e-79	1.34868e-76	169.267	DOWN
METRN	1.44976	3.28595	20.571	9.53448e-79	2.47759e-76	168.624	UP
CXXC5	1.11581	4.59597	20.383	1.45032e-77	3.6312e-75	165.914	UP
PAFAH1B3	1.14236	5.07972	20.2718	7.22779e-77	1.7098e-74	164.314	UP
CX3CL1	-1.66475	3.31518	-20.2453	1.05848e-76	2.46986e-74	163.935	DOWN
FOXC1	-1.5863	2.10423	-20.2277	1.36395e-76	3.11899e-74	163.682	DOWN
TMC4	1.30775	4.74873	20.1046	8.02655e-76	1.73156e-73	161.917	UP
GPRC5B	-1.03959	2.60176	-20.068	1.35669e-75	2.89042e-73	161.395	DOWN
NFIL3	-1.06435	3.50829	-20.0525	1.69645e-75	3.56993e-73	161.172	DOWN
EVL	1.30228	4.19807	20.0317	2.2858e-75	4.75183e-73	160.875	UP
GNAI1	-1.02761	2.01061	-20.0086	3.18226e-75	6.57558e-73	160.546	DOWN
SYNM	-1.86166	2.63675	-20.0028	3.45945e-75	7.06325e-73	160.463	DOWN
BOC	-1.02226	1.66227	-19.9127	1.25829e-74	2.53887e-72	159.177	DOWN
PRRT3	1.00701	2.10354	19.7791	8.49195e-74	1.64566e-71	157.276	UP
RARRES1	-1.88556	3.34395	-19.7084	2.32725e-73	4.45961e-71	156.272	DOWN
KRT18	1.42031	7.46631	19.6494	5.39138e-73	1.00505e-70	155.436	UP
PSAT1	-1.69812	2.01615	-19.6292	7.18808e-73	1.31849e-70	155.149	DOWN
MISP	1.69033	3.10519	19.5206	3.36272e-72	5.97641e-70	153.613	UP
LDHB	-1.48613	5.49577	-19.517	3.53971e-72	6.25853e-70	153.562	DOWN
GATA3-AS1	1.39675	1.74352	19.4923	5.02066e-72	8.78642e-70	153.214	UP
UBE2E3	-1.01022	3.56947	-19.4848	5.588e-72	9.71483e-70	153.108	DOWN
MAGED2	1.21561	7.59544	19.4845	5.60781e-72	9.71483e-70	153.104	UP
CRYAB	-2.10588	3.76277	-19.4184	1.43137e-71	2.43057e-69	152.171	DOWN
RND3	-1.17437	3.62945	-19.374	2.68354e-71	4.51216e-69	151.546	DOWN
FMO2	-1.5511	1.92334	-19.319	5.83864e-71	9.58235e-69	150.772	DOWN
SIAH2	1.11378	4.98482	19.3177	5.9424e-71	9.70621e-69	150.754	UP
MISP3	1.03038	2.42394	19.3084	6.78228e-71	1.10255e-68	150.623	UP
CREB3L4	1.17648	5.06177	19.2622	1.3005e-70	2.06521e-68	149.974	UP
SLC44A4	2.1481	4.23812	19.2421	1.728e-70	2.7189e-68	149.691	UP
GABRP	-2.68299	2.9077	-19.2175	2.44515e-70	3.81232e-68	149.346	DOWN
HPN	1.50314	3.15322	19.1429	6.98455e-70	1.06954e-67	148.301	UP
SPRY2	-1.11561	2.34081	-19.1343	7.88326e-70	1.19648e-67	148.18	DOWN
NAT1	2.38072	3.83898	19.079	1.71491e-69	2.54646e-67	147.407	UP
KCNK15	1.45442	2.18118	19.078	1.73958e-69	2.57195e-67	147.393	UP
ZG16B	1.68579	4.24615	19.0672	2.02239e-69	2.96453e-67	147.243	UP
ARL4C	-1.00031	3.6906	-19.0494	2.59895e-69	3.7774e-67	146.993	DOWN
S100B	-1.86331	2.10816	-19.0051	4.8362e-69	6.8266e-67	146.375	DOWN
ID4	-1.70321	2.90041	-18.9717	7.71827e-69	1.06706e-66	145.909	DOWN
FOXA1	2.20634	5.3941	18.9463	1.10171e-68	1.4996e-66	145.555	UP
ZNF703	1.57982	5.10091	18.92	1.59101e-68	2.14013e-66	145.189	UP
CAV2	-1.12846	2.42746	-18.9168	1.6639e-68	2.22076e-66	145.145	DOWN
HID1	1.21405	4.32934	18.8737	3.04293e-68	3.9612e-66	144.544	UP
COX6C	1.5774	6.61232	18.8356	5.17679e-68	6.67552e-66	144.015	UP
BBOX1	-1.41946	1.37348	-18.7931	9.36928e-68	1.19028e-65	143.424	DOWN
RCAN1	-1.21153	3.11565	-18.5148	4.47759e-66	5.35143e-64	139.575	DOWN
SLC9A3R1	1.30044	6.73327	18.4072	1.98122e-65	2.26526e-63	138.095	UP
CA12	2.0305	5.02419	18.3155	7.02075e-65	7.79348e-63	136.836	UP
TCEAL3	1.06935	4.05701	18.3055	8.05915e-65	8.88865e-63	136.698	UP
TRIM29	-1.63025	2.12097	-18.2938	9.46833e-65	1.03431e-62	136.538	DOWN
AKR7A3	1.81633	2.81991	18.2864	1.04751e-64	1.13704e-62	136.437	UP
PRR36	1.12355	2.83399	18.2421	1.92634e-64	2.03309e-62	135.831	UP
YBX3	-1.01598	3.72548	-18.2401	1.98172e-64	2.08512e-62	135.803	DOWN
RHPN1	1.06055	3.12088	18.1906	3.91096e-64	4.00447e-62	135.126	UP
SREBF1	1.05242	4.95643	18.1557	6.30536e-64	6.41781e-62	134.651	UP
SPDEF	2.00833	5.75723	18.1448	7.32204e-64	7.43057e-62	134.502	UP
RGS2	-1.4337	3.6617	-17.9897	6.11191e-63	5.85599e-61	132.39	DOWN
TNFRSF21	-1.01581	3.69868	-17.9177	1.63137e-62	1.50424e-60	131.413	DOWN
DDR2	-1.04451	2.54841	-17.9171	1.64369e-62	1.51153e-60	131.406	DOWN
ALDH1A3	-1.04413	1.9037	-17.9099	1.81339e-62	1.66314e-60	131.308	DOWN
LINC02188	-1.21056	0.833493	-17.8702	3.11274e-62	2.80974e-60	130.77	DOWN
FBP1	1.42091	5.08837	17.856	3.77686e-62	3.39136e-60	130.578	UP
PTX3	-1.24164	1.14095	-17.8347	5.04427e-62	4.49412e-60	130.29	DOWN
TSPAN13	1.13405	6.70191	17.8289	5.46086e-62	4.84013e-60	130.211	UP
CELSR1	1.26305	3.78301	17.7707	1.20237e-61	1.04412e-59	129.425	UP
SLC6A14	-1.34656	1.05772	-17.7372	1.89554e-61	1.63364e-59	128.972	DOWN
AGR2	2.67931	6.05545	17.7303	2.07933e-61	1.78308e-59	128.88	UP
TFF3	2.78773	5.56068	17.6682	4.82119e-61	4.08325e-59	128.043	UP
BCAM	1.23058	5.69414	17.6573	5.58616e-61	4.71948e-59	127.897	UP
LINC02613	-1.0949	0.977423	-17.6231	8.87026e-61	7.43909e-59	127.436	DOWN
PKP1	-1.59807	2.04685	-17.5726	1.75261e-60	1.45913e-58	126.759	DOWN
LOXL4	-1.09272	1.39918	-17.5714	1.78197e-60	1.47998e-58	126.742	DOWN
DSC2	-1.15621	2.63388	-17.5418	2.65609e-60	2.17959e-58	126.345	DOWN
HSPB1	1.25071	7.72082	17.5317	3.04349e-60	2.47969e-58	126.209	UP
DNAJC12	1.74752	3.36863	17.3423	3.873e-59	2.97865e-57	123.678	UP
SCCPDH	1.00416	5.14427	17.3383	4.08274e-59	3.12594e-57	123.626	UP
FSIP1	1.47876	1.99338	17.2066	2.37257e-58	1.75391e-56	121.875	UP
FAM107A	-1.17696	1.29078	-17.1851	3.16031e-58	2.31134e-56	121.59	DOWN
VGLL1	-1.66478	1.22485	-17.1137	8.18199e-58	5.83473e-56	120.643	DOWN
HAPLN3	-1.19861	2.52256	-17.1069	8.95525e-58	6.37291e-56	120.553	DOWN
MRC1	-1.02446	1.53824	-17.0529	1.83449e-57	1.29209e-55	119.84	DOWN
MFGE8	-1.19499	4.2953	-17.0308	2.45858e-57	1.71755e-55	119.548	DOWN
PM20D2	-1.00384	1.72929	-17.0293	2.50917e-57	1.74933e-55	119.528	DOWN
LMX1B	1.18717	3.29292	16.9913	4.1472e-57	2.83373e-55	119.028	UP
KIT	-1.55342	2.59997	-16.9394	8.24531e-57	5.53468e-55	118.344	DOWN
DNALI1	1.36823	2.86408	16.9166	1.11544e-56	7.42924e-55	118.044	UP
TTC39A	1.17417	3.39647	16.8745	1.94242e-56	1.28129e-54	117.492	UP
ADGRB2	1.06717	1.94102	16.8398	3.07025e-56	2.00214e-54	117.036	UP
FZD7	-1.02325	3.68326	-16.8198	3.99928e-56	2.58829e-54	116.773	DOWN
ZNF552	1.23714	3.97477	16.815	4.25823e-56	2.74552e-54	116.711	UP
CMBL	1.1672	4.17598	16.7277	1.34176e-55	8.30752e-54	115.569	UP
TPSP2	1.28696	1.31295	16.7012	1.90099e-55	1.16439e-53	115.222	UP
PROM1	-1.80439	2.30853	-16.6955	2.04686e-55	1.2515e-53	115.149	DOWN
PPP1R14C	-1.37475	1.36398	-16.6893	2.2196e-55	1.3523e-53	115.068	DOWN
TCF7L1	-1.09731	2.79339	-16.6703	2.85082e-55	1.71554e-53	114.819	DOWN
IL34	-1.12943	1.94826	-16.6636	3.11099e-55	1.86556e-53	114.732	DOWN
CLMP	-1.00946	2.86186	-16.6627	3.14608e-55	1.88331e-53	114.721	DOWN
AZGP1P1	1.04837	1.67425	16.6382	4.33665e-55	2.56911e-53	114.402	UP
ADAMTS1	-1.18245	2.91059	-16.5589	1.22371e-54	7.06642e-53	113.37	DOWN
STAC2	-2.09853	2.24578	-16.5474	1.42106e-54	8.19222e-53	113.221	DOWN
FBXL16	1.20927	2.6724	16.5171	2.11099e-54	1.1929e-52	112.828	UP
MYB	1.27734	3.64282	16.4999	2.6398e-54	1.47954e-52	112.605	UP
TFF1	3.2466	5.34706	16.4592	4.48579e-54	2.48173e-52	112.078	UP
TSPAN1	1.84945	4.11996	16.4312	6.45978e-54	3.55661e-52	111.715	UP
PADI2	-1.54534	3.15693	-16.4275	6.77461e-54	3.71802e-52	111.668	DOWN
EEF1A2	2.22269	3.95311	16.4184	7.62622e-54	4.17204e-52	111.55	UP
DEPP1	-1.21657	4.49496	-16.3576	1.67866e-53	8.9968e-52	110.765	DOWN
NRN1	-1.02065	2.60831	-16.2276	9.0168e-53	4.70754e-51	109.093	DOWN
REEP6	1.5493	4.04122	16.2148	1.06459e-52	5.53283e-51	108.928	UP
KRT8	1.20313	7.47098	16.2141	1.07374e-52	5.57193e-51	108.919	UP
SLC16A6	1.39442	2.46737	16.1418	2.72465e-52	1.38868e-50	107.993	UP
TGFBR2	-1.03135	4.52261	-16.1338	3.02099e-52	1.53288e-50	107.89	DOWN
ENPP2	-1.15575	2.41612	-16.1147	3.86452e-52	1.95224e-50	107.645	DOWN
MYLK	-1.02532	2.69935	-16.1015	4.5788e-52	2.3029e-50	107.477	DOWN
TINAGL1	-1.08358	2.88122	-16.0921	5.16542e-52	2.58278e-50	107.357	DOWN
SUSD3	1.77486	4.39195	16.0819	5.88929e-52	2.94044e-50	107.226	UP
EDN1	-1.07612	2.50837	-16.0702	6.83799e-52	3.39435e-50	107.078	DOWN
DEFB1	-1.59776	2.03885	-16.0561	8.19926e-52	4.04666e-50	106.897	DOWN
ELF5	-1.70075	1.95411	-16.0205	1.29301e-51	6.32692e-50	106.444	DOWN
CAPN6	-1.31559	1.22649	-16.0033	1.61226e-51	7.85539e-50	106.225	DOWN
FGD3	1.19093	2.81259	15.9318	4.02315e-51	1.93004e-49	105.315	UP
KLF5	-1.16034	2.67154	-15.9201	4.66964e-51	2.23082e-49	105.167	DOWN
CXCL2	-1.19725	1.29911	-15.9065	5.55301e-51	2.6418e-49	104.995	DOWN
CHRDL1	-1.63141	2.13519	-15.8131	1.82518e-50	8.39217e-49	103.811	DOWN
EVA1B	1.15135	3.72703	15.8075	1.95977e-50	8.96296e-49	103.74	UP
CYP2B7P	2.31022	2.78373	15.7967	2.2485e-50	1.02697e-48	103.604	UP
DSC3	-1.29221	1.53941	-15.793	2.35629e-50	1.07478e-48	103.557	DOWN
NKAIN1	1.82637	2.73783	15.7523	3.95036e-50	1.78526e-48	103.043	UP
MAPT	1.3435	2.65851	15.7518	3.97314e-50	1.7932e-48	103.038	UP
KIF12	1.4149	3.01651	15.6833	9.45989e-50	4.1923e-48	102.175	UP
SERPINA11	1.62507	2.22356	15.6815	9.67788e-50	4.28337e-48	102.152	UP
SERPINB5	-1.50685	1.99828	-15.6378	1.68282e-49	7.40029e-48	101.602	DOWN
MT1X	-1.2063	4.00982	-15.6142	2.26704e-49	9.89333e-48	101.306	DOWN
SLC7A8	1.19668	4.15295	15.6132	2.29585e-49	9.99363e-48	101.293	UP
MME	-1.2071	1.96386	-15.5631	4.31293e-49	1.83091e-47	100.666	DOWN
LRG1	1.62104	2.9772	15.561	4.42978e-49	1.87819e-47	100.64	UP
MUC1	1.71722	5.91545	15.5369	5.99898e-49	2.53413e-47	100.338	UP
ABAT	1.15255	2.45742	15.4575	1.62599e-48	6.71157e-47	99.3466	UP
AIF1L	-1.15296	3.20364	-15.4343	2.17405e-48	8.88822e-47	99.0578	DOWN
SOSTDC1	-1.2461	1.25915	-15.3028	1.12467e-47	4.43417e-46	97.4236	DOWN
SLC39A6	1.55227	7.32052	15.2654	1.79189e-47	6.99246e-46	96.9605	UP
H2AJ	1.04782	4.8091	15.2438	2.34471e-47	9.04678e-46	96.6932	UP
CCNP	1.031	1.6134	15.2342	2.64206e-47	1.01712e-45	96.5745	UP
FDCSP	-2.44671	2.64038	-15.2091	3.609e-47	1.37853e-45	96.2644	DOWN
PKIB	1.25832	3.26173	15.1446	8.02658e-47	3.01555e-45	95.4697	UP
ACSL1	-1.0971	4.10684	-15.081	1.76316e-46	6.50304e-45	94.6873	DOWN
PCOLCE2	-1.26279	1.254	-15.0589	2.31559e-46	8.48581e-45	94.4164	DOWN
ARMT1	1.18624	4.72816	15.0189	3.79187e-46	1.37781e-44	93.9261	UP
ANXA3	-1.05533	2.35168	-14.9434	9.59592e-46	3.40382e-44	93.0031	DOWN
CDH3	-1.32414	3.02997	-14.8456	3.18263e-45	1.09716e-43	91.8112	DOWN
TBC1D9	1.43935	5.5845	14.8043	5.27297e-45	1.79078e-43	91.3093	UP
KLK5	-1.79513	2.11425	-14.7129	1.60554e-44	5.35196e-43	90.2026	DOWN
PYCARD	1.0406	4.05888	14.6532	3.31369e-44	1.06826e-42	89.4823	UP
KRT19	1.33055	8.76651	14.6126	5.42216e-44	1.72849e-42	88.9929	UP
LYVE1	-1.07832	1.11902	-14.5085	1.90728e-43	5.90124e-42	87.7428	DOWN
CCDC74A	1.27345	2.79552	14.5083	1.90967e-43	5.90124e-42	87.7416	UP
THSD4	1.16179	2.84263	14.508	1.91701e-43	5.91857e-42	87.7378	UP
FABP7	-1.44184	1.01704	-14.4921	2.32308e-43	7.13376e-42	87.5468	DOWN
LPL	-1.61502	3.02928	-14.4748	2.85864e-43	8.74705e-42	87.3406	DOWN
IL33	-1.18431	2.02633	-14.446	4.04324e-43	1.22407e-41	86.9961	DOWN
KLK6	-1.48517	1.48541	-14.3726	9.75481e-43	2.90704e-41	86.1208	DOWN
HRCT1	-1.16391	1.47771	-14.347	1.32563e-42	3.92663e-41	85.816	DOWN
H2BC5	1.20375	4.9593	14.3409	1.4263e-42	4.22118e-41	85.7433	UP
TF	-1.13126	1.19793	-14.3351	1.52865e-42	4.5163e-41	85.6744	DOWN
SEMA3B	1.03741	2.20952	14.2949	2.47202e-42	7.22871e-41	85.1968	UP
GLYATL2	-1.57258	2.14328	-14.2836	2.82633e-42	8.24372e-41	85.0637	DOWN
KLK7	-1.31323	1.32053	-14.2824	2.86741e-42	8.35641e-41	85.0493	DOWN
C1S	-1.00802	5.48494	-14.2608	3.70891e-42	1.07177e-40	84.7936	DOWN
RET	1.36801	2.38199	14.2549	3.98066e-42	1.14933e-40	84.7233	UP
SCARA5	-1.09963	0.94805	-14.2228	5.8339e-42	1.66757e-40	84.3435	DOWN
PARD6B	1.12125	2.86022	14.1533	1.33189e-41	3.69025e-40	83.5232	UP
MMP7	-1.66078	3.72903	-14.1321	1.71295e-41	4.72693e-40	83.2732	DOWN
SLC34A2	-1.56075	2.02829	-14.0471	4.67914e-41	1.25981e-39	82.2748	DOWN
ITM2A	-1.1171	3.31078	-13.9933	8.81403e-41	2.34911e-39	81.6456	DOWN
NDRG2	-1.04523	3.48065	-13.9914	9.01689e-41	2.39944e-39	81.623	DOWN
RAMP1	1.28066	2.87702	13.9849	9.73437e-41	2.58636e-39	81.5469	UP
SRPX	-1.00456	3.10934	-13.9753	1.09036e-40	2.88281e-39	81.4342	DOWN
CAV1	-1.12063	4.33263	-13.965	1.22952e-40	3.23418e-39	81.3149	DOWN
GREB1	1.24353	2.67229	13.9371	1.70704e-40	4.44258e-39	80.9889	UP
NPNT	1.28927	4.25909	13.9339	1.77263e-40	4.60281e-39	80.9514	UP
PRR15L	1.04872	4.64909	13.9324	1.80419e-40	4.68121e-39	80.9339	UP
CHI3L1	-1.50859	3.58702	-13.931	1.8342e-40	4.75548e-39	80.9175	DOWN
HSH2D	1.00416	2.19575	13.9081	2.39969e-40	6.17492e-39	80.6505	UP
KRT5	-2.14659	3.96613	-13.9013	2.5992e-40	6.66333e-39	80.5712	DOWN
GDF15	1.22118	2.45955	13.8182	6.868e-40	1.72586e-38	79.6059	UP
PREX1	1.07413	4.44988	13.7682	1.2306e-39	3.03239e-38	79.0265	UP
MIA	-1.11851	1.13186	-13.7223	2.0973e-39	5.12026e-38	78.4969	DOWN
CCND1	1.15369	6.21708	13.7158	2.26152e-39	5.5016e-38	78.422	UP
DGAT2	-1.09647	2.23504	-13.6988	2.75474e-39	6.66363e-38	78.226	DOWN
TPRG1	1.23589	1.86713	13.6454	5.1149e-39	1.22262e-37	77.6113	UP
TNNT1	1.5475	2.52561	13.6375	5.60616e-39	1.33911e-37	77.5202	UP
SAA2-SAA4	-1.20823	1.29323	-13.6063	8.03921e-39	1.91097e-37	77.1622	DOWN
TTC36	1.00924	1.87386	13.5849	1.02962e-38	2.42896e-37	76.9164	UP
VAV3	1.10135	4.24199	13.5627	1.32926e-38	3.11228e-37	76.6627	UP
GSTP1	-1.14205	6.01775	-13.5568	1.42276e-38	3.32213e-37	76.5952	DOWN
BCAS1	1.08512	1.86175	13.5294	1.95127e-38	4.52845e-37	76.2814	UP
TPSG1	1.00906	1.05847	13.4995	2.75053e-38	6.31499e-37	75.9404	UP
FAM234B	1.10506	3.21518	13.4469	5.02918e-38	1.1379e-36	75.3411	UP
MARCO	-1.05285	1.22864	-13.4454	5.11712e-38	1.15627e-36	75.3239	DOWN
KRT16	-1.6306	2.01105	-13.3994	8.66117e-38	1.9329e-36	74.8012	DOWN
KRT6B	-1.67016	2.48556	-13.3806	1.07448e-37	2.38239e-36	74.5871	DOWN
DSG3	-1.17937	1.3612	-13.2936	2.89296e-37	6.26065e-36	73.6035	DOWN
MATN2	-1.07485	2.37446	-13.2897	3.02567e-37	6.53071e-36	73.559	DOWN
BMPR1B-DT	1.00361	0.959682	13.2819	3.3062e-37	7.12349e-36	73.471	UP
CALB2	-1.29559	2.27448	-13.234	5.69524e-37	1.20217e-35	72.9309	DOWN
PI3	-1.47007	1.41751	-13.2056	7.85158e-37	1.6472e-35	72.6121	DOWN
SRARP	1.26907	2.07015	13.1297	1.84982e-36	3.80171e-35	71.7612	UP
SOD3	-1.10661	2.83808	-13.0953	2.72629e-36	5.56633e-35	71.3761	DOWN
C3	-1.03933	5.61341	-13.0764	3.37043e-36	6.82462e-35	71.1655	DOWN
GFRA1	1.74159	3.94962	13.0284	5.77759e-36	1.1569e-34	70.6304	UP
PPP1R1A	-1.19118	1.65147	-13.024	6.07355e-36	1.21404e-34	70.5808	DOWN
SCNN1A	1.08797	3.90379	12.9659	1.16376e-35	2.28364e-34	69.9352	UP
SAA2	-1.20836	1.63835	-12.9266	1.8042e-35	3.50827e-34	69.4999	DOWN
GPRC5A	1.09716	4.72561	12.8866	2.81486e-35	5.43039e-34	69.0583	UP
JCHAIN	-1.83691	5.60649	-12.8822	2.9567e-35	5.69122e-34	69.0095	DOWN
KCNN4	-1.04701	2.62725	-12.8495	4.25399e-35	8.10195e-34	68.6484	DOWN
KCNE4	1.30875	2.94505	12.8334	5.08328e-35	9.63857e-34	68.4716	UP
ACTG2	-1.49693	2.78322	-12.7845	8.74086e-35	1.63212e-33	67.9335	DOWN
SLPI	-1.77662	4.98106	-12.7399	1.42999e-34	2.64136e-33	67.4449	DOWN
CFB	1.14671	2.87277	12.7396	1.43471e-34	2.64865e-33	67.4416	UP
WIF1	-1.06732	0.817873	-12.738	1.46153e-34	2.69671e-33	67.4232	DOWN
CAPN8	1.17273	2.20931	12.7378	1.46348e-34	2.69886e-33	67.4219	UP
ECRG4	-1.09478	1.30128	-12.7071	2.05353e-34	3.74472e-33	67.0857	DOWN
SAA1	-1.87817	4.67158	-12.6685	3.14186e-34	5.65716e-33	66.6636	DOWN
CLDN8	-1.11986	1.99628	-12.6324	4.66817e-34	8.33106e-33	66.2706	DOWN
ATF3	-1.01944	3.15679	-12.5931	7.18271e-34	1.26346e-32	65.8429	DOWN
RNU6-813P	1.15457	1.30411	12.5363	1.33609e-33	2.31578e-32	65.227	UP
IRX1	-1.17304	1.82042	-12.4873	2.27755e-33	3.90806e-32	64.6977	DOWN
PRELP	-1.04103	3.09353	-12.4858	2.31451e-33	3.96752e-32	64.6817	DOWN
CCL18	-1.14317	1.79241	-12.4643	2.92434e-33	4.98548e-32	64.4496	DOWN
IGFBP2	1.0447	4.38605	12.3957	6.15378e-33	1.02816e-31	63.7114	UP
IGLV2-11	-1.64799	4.18475	-12.3895	6.57928e-33	1.09711e-31	63.645	DOWN
KRT17	-1.89809	4.37553	-12.3495	1.01339e-32	1.67682e-31	63.2164	DOWN
SLC27A2	1.08919	2.00718	12.2978	1.7697e-32	2.88647e-31	62.6632	UP
FHL1	-1.19169	2.84308	-12.2489	2.99032e-32	4.79304e-31	62.1428	DOWN
ASS1	-1.12306	4.54806	-12.2244	3.89169e-32	6.20878e-31	61.8814	DOWN
PHGDH	-1.03015	3.32821	-12.1628	7.51281e-32	1.18318e-30	61.2288	DOWN
SCUBE2	1.65504	4.16383	12.1313	1.052e-31	1.63946e-30	60.8949	UP
BMPR1B	1.78031	2.70454	12.0462	2.59786e-31	3.95689e-30	59.9981	UP
C19orf33	1.39918	3.49221	12.0302	3.076e-31	4.67478e-30	59.8305	UP
KCNJ3	1.47384	1.49306	11.9677	5.95926e-31	8.90281e-30	59.1746	UP
C4B	1.09505	2.75497	11.9192	9.93046e-31	1.46694e-29	58.6681	UP
GPX3	-1.18053	4.22842	-11.7966	3.58377e-30	5.14554e-29	57.3953	DOWN
GALNT6	1.04323	4.25873	11.7341	6.87061e-30	9.66251e-29	56.75	UP
IGHV4-61	-1.05478	1.6403	-11.7191	8.03512e-30	1.12495e-28	56.5947	DOWN
IGHV2-5	-1.24261	2.11363	-11.6897	1.09033e-29	1.51415e-28	56.292	DOWN
EN1	-1.0065	1.28959	-11.6757	1.25991e-29	1.74048e-28	56.1487	DOWN
RIMS4	1.14179	1.6485	11.6525	1.60238e-29	2.19852e-28	55.9103	UP
AFF3	1.10568	2.7892	11.6364	1.8918e-29	2.5822e-28	55.7457	UP
C4A	1.05094	2.66258	11.6354	1.91061e-29	2.60684e-28	55.7359	UP
FOLR1	-1.1864	1.7178	-11.6336	1.94783e-29	2.65656e-28	55.7167	DOWN
LAMB3	-1.08825	3.38115	-11.5949	2.90389e-29	3.90919e-28	55.3208	DOWN
AR	1.03747	3.46408	11.5824	3.30224e-29	4.42634e-28	55.1934	UP
SYT1	1.05661	1.49467	11.5301	5.64818e-29	7.47735e-28	54.6613	UP
CCL21	-1.3718	2.92619	-11.5131	6.7236e-29	8.85321e-28	54.4885	DOWN
IGKJ5	-1.00725	1.53686	-11.5106	6.90187e-29	9.07749e-28	54.4625	DOWN
IGHV4-39	-1.66843	4.4442	-11.4578	1.18454e-28	1.53209e-27	53.9271	DOWN
IGKV1-27	-1.40082	3.0629	-11.4216	1.71213e-28	2.18969e-27	53.5619	DOWN
IGKV1-5	-1.69245	5.30383	-11.4155	1.82241e-28	2.32467e-27	53.5001	DOWN
IGHV1-46	-1.41701	3.12224	-11.3543	3.39531e-28	4.2629e-27	52.8833	DOWN
CRABP2	1.14456	8.1055	11.3211	4.75074e-28	5.91489e-27	52.5504	UP
IGHV3-15	-1.56514	4.14003	-11.3157	5.01898e-28	6.2398e-27	52.496	DOWN
CAVIN2	-1.03524	1.93306	-11.2597	8.83023e-28	1.08019e-26	51.9361	DOWN
PLAAT4	1.00994	5.8789	11.167	2.24058e-27	2.68439e-26	51.0133	UP
ECM1	1.07206	4.18905	11.1607	2.38646e-27	2.85021e-26	50.9508	UP
CCNO	1.04316	2.05193	11.1385	2.9811e-27	3.54313e-26	50.7304	UP
CP	-1.27667	2.08945	-11.1377	3.00492e-27	3.56897e-26	50.7225	DOWN
MMP11	1.37061	4.77101	11.1242	3.43754e-27	4.0645e-26	50.5892	UP
CHAD	1.37595	2.95842	11.1208	3.55558e-27	4.19827e-26	50.5558	UP
PI16	-1.1547	1.6673	-11.1102	3.95259e-27	4.65423e-26	50.4509	DOWN
IGHV4-59	-1.52687	3.93284	-11.0822	5.22366e-27	6.09444e-26	50.1746	DOWN
IGLV2-14	-1.66578	5.27888	-11.0816	5.25352e-27	6.12511e-26	50.169	DOWN
IGHV2-70	-1.23121	2.10027	-11.0783	5.43141e-27	6.32822e-26	50.136	DOWN
IGKV4-1	-1.67739	5.42237	-11.021	9.59077e-27	1.10172e-25	49.5727	DOWN
CACNG4	1.25417	3.81953	10.9859	1.35794e-26	1.54644e-25	49.2282	UP
IGKV3-20	-1.63806	6.13635	-10.954	1.8606e-26	2.1035e-25	48.9162	DOWN
IGHV3-21	-1.54178	3.818	-10.8616	4.61875e-26	5.11387e-25	48.0156	DOWN
CHI3L2	-1.08429	2.47883	-10.7982	8.58285e-26	9.37283e-25	47.4019	DOWN
LEP	-1.20295	1.15873	-10.7822	1.00347e-25	1.09132e-24	47.2471	DOWN
IGHV5-51	-1.56798	4.50838	-10.7548	1.30975e-25	1.41187e-24	46.9833	DOWN
IGHV4-30-2	-1.22542	2.66229	-10.751	1.35903e-25	1.46315e-24	46.9467	DOWN
IGHV3-74	-1.30651	3.42811	-10.7393	1.52319e-25	1.63527e-24	46.8338	DOWN
DPT	-1.12809	4.08138	-10.6859	2.55638e-25	2.69721e-24	46.321	DOWN
IGLV1-44	-1.52146	4.23461	-10.673	2.89659e-25	3.04773e-24	46.1973	DOWN
ADAMTS15	1.00704	2.96603	10.6685	3.02442e-25	3.17832e-24	46.1546	UP
IGHV3-53	-1.0933	2.17283	-10.667	3.06965e-25	3.22487e-24	46.1399	DOWN
CYP2T1P	1.4978	3.19237	10.658	3.34845e-25	3.50703e-24	46.0538	UP
IGHV3-33	-1.36979	3.26775	-10.6028	5.70048e-25	5.87889e-24	45.527	DOWN
GP2	1.17137	1.82141	10.5864	6.67041e-25	6.8442e-24	45.3714	UP
IGHV4-34	-1.31187	3.37155	-10.5699	7.81528e-25	7.9953e-24	45.2146	DOWN
IGKV3-11	-1.5401	5.2521	-10.5591	8.67282e-25	8.84061e-24	45.1115	DOWN
IGKV1-16	-1.33163	3.35571	-10.5576	8.79836e-25	8.96325e-24	45.0973	DOWN
STC2	1.38883	5.01104	10.5498	9.47901e-25	9.63376e-24	45.0235	UP
DIO1	1.00811	1.40986	10.53	1.14563e-24	1.15747e-23	44.8359	UP
IGLV1-47	-1.47196	3.89493	-10.5231	1.2241e-24	1.23421e-23	44.7704	DOWN
IGLV2-8	-1.28129	3.27536	-10.5118	1.36353e-24	1.36996e-23	44.6636	DOWN
IGHV3-23	-1.5665	5.11324	-10.5105	1.38032e-24	1.38642e-23	44.6515	DOWN
IGHV1-18	-1.62005	4.4329	-10.4962	1.58271e-24	1.58138e-23	44.516	DOWN
IGKV1-6	-1.24916	3.08195	-10.4539	2.36795e-24	2.34072e-23	44.1172	DOWN
IGLV3-21	-1.52512	4.32905	-10.434	2.86199e-24	2.81448e-23	43.9296	DOWN
IGHV3-72	-1.0691	2.26667	-10.4326	2.89979e-24	2.8492e-23	43.9166	DOWN
SERPINA5	1.19838	3.05427	10.4131	3.4895e-24	3.40715e-23	43.7334	UP
IGHV1-69D	-1.39199	3.20037	-10.3996	3.96521e-24	3.86504e-23	43.6069	DOWN
IGKV1-17	-1.32896	3.33496	-10.3972	4.0581e-24	3.95445e-23	43.584	DOWN
IGHV3-49	-1.32417	3.10195	-10.3883	4.4124e-24	4.29117e-23	43.5012	DOWN
IGKV1-9	-1.33205	3.6622	-10.3789	4.82456e-24	4.68139e-23	43.4128	DOWN
IGLV6-57	-1.40254	3.30949	-10.3765	4.93578e-24	4.78255e-23	43.3902	DOWN
RBP4	-1.28302	2.14737	-10.3555	6.01974e-24	5.80498e-23	43.1937	DOWN
IGLV7-46	-1.14852	2.52093	-10.326	7.95175e-24	7.60605e-23	42.9183	DOWN
OXTR	-1.02359	1.81157	-10.2906	1.10842e-23	1.04853e-22	42.5896	DOWN
IGLV7-43	-1.08644	2.35307	-10.2861	1.15628e-23	1.09291e-22	42.5477	DOWN
IGLL5	-1.20908	3.04732	-10.2826	1.19601e-23	1.12921e-22	42.5143	DOWN
H1-2	1.02258	6.13576	10.2742	1.29302e-23	1.21846e-22	42.4371	UP
IGLV1-40	-1.48946	4.85135	-10.273	1.30788e-23	1.23178e-22	42.4258	DOWN
IGLV3-25	-1.52302	4.36402	-10.2585	1.49856e-23	1.40789e-22	42.2912	DOWN
IGHV3-11	-1.39246	3.53594	-10.257	1.51982e-23	1.42669e-22	42.2772	DOWN
CRABP1	-1.4459	2.3082	-10.2261	2.02937e-23	1.89104e-22	41.9911	DOWN
IGHV3-73	-1.18439	2.28809	-10.2257	2.03785e-23	1.89844e-22	41.987	DOWN
IGHJ3	-1.15463	2.58929	-10.2194	2.16157e-23	2.01096e-22	41.9287	DOWN
ADH1B	-1.37004	2.191	-10.1946	2.72391e-23	2.52113e-22	41.6999	DOWN
IGHV1-2	-1.42806	3.38438	-10.1534	3.99631e-23	3.65833e-22	41.3207	DOWN
HSPB6	-1.08641	2.51747	-10.1502	4.11819e-23	3.76487e-22	41.2909	DOWN
IGKV3-15	-1.34444	4.02869	-10.1466	4.25761e-23	3.88922e-22	41.258	DOWN
LINC00993	1.54846	3.62484	10.1315	4.8977e-23	4.45258e-22	41.1194	UP
IGLV5-45	-1.06494	1.98856	-10.1253	5.1897e-23	4.70682e-22	41.0621	DOWN
CEACAM5	1.21908	1.78265	10.1243	5.23873e-23	4.74877e-22	41.0528	UP
KRT14	-1.6787	4.11811	-10.0947	6.89177e-23	6.1932e-22	40.7815	DOWN
CD36	-1.19002	2.73885	-10.094	6.93313e-23	6.22548e-22	40.7756	DOWN
IGHV3-30	-1.38958	3.87886	-10.0848	7.55068e-23	6.76859e-22	40.6912	DOWN
IGHM	-1.55386	5.28268	-10.0179	1.3996e-22	1.23318e-21	40.0808	DOWN
IGKV3D-20	-1.02647	2.13413	-10.0012	1.63095e-22	1.42967e-21	39.9295	DOWN
IGLV2-23	-1.44141	4.63121	-9.99908	1.66355e-22	1.45676e-21	39.9099	DOWN
IGKC	-1.56364	7.43244	-9.98003	1.98134e-22	1.72492e-21	39.737	DOWN
IGLV1-51	-1.38902	4.59327	-9.97667	2.04332e-22	1.77708e-21	39.7065	DOWN
IGLV3-27	-1.05009	1.74835	-9.93737	2.9276e-22	2.52184e-21	39.3509	DOWN
G0S2	-1.19522	3.37236	-9.92737	3.20773e-22	2.75484e-21	39.2605	DOWN
IGLV3-19	-1.5025	4.64783	-9.924	3.30811e-22	2.83892e-21	39.23	DOWN
KRT81	-1.38692	2.22619	-9.92347	3.32412e-22	2.85123e-21	39.2252	DOWN
IGLV4-69	-1.30457	3.16301	-9.91356	3.63847e-22	3.10997e-21	39.1359	DOWN
PTN	-1.09299	3.20943	-9.88862	4.5667e-22	3.87249e-21	38.9112	DOWN
AQP5	-1.07331	1.43217	-9.86314	5.75719e-22	4.86278e-21	38.6821	DOWN
IGHV3-48	-1.1606	2.49531	-9.77991	1.22299e-21	1.01598e-20	37.9372	DOWN
S100A14	1.12758	6.43634	9.76466	1.40326e-21	1.1632e-20	37.8012	UP
IGKV2-24	-1.11341	2.73755	-9.75741	1.498e-21	1.24083e-20	37.7367	DOWN
S100A9	-1.5196	5.0357	-9.69724	2.5717e-21	2.10429e-20	37.2024	DOWN
IGLC2	-1.4388	6.47116	-9.68663	2.82808e-21	2.31022e-20	37.1085	DOWN
PGR	1.08109	2.23666	9.61707	5.26136e-21	4.21954e-20	36.4949	UP
EGR1	-1.02548	5.83651	-9.58368	7.07945e-21	5.63285e-20	36.2016	DOWN
IGHA1	-1.47526	7.90411	-9.46686	1.98609e-20	1.53331e-19	35.1822	DOWN
IGLC3	-1.4118	5.79905	-9.39157	3.84006e-20	2.91992e-19	34.5309	DOWN
SLC7A2	1.20817	3.65827	9.39123	3.85143e-20	2.92793e-19	34.528	UP
IGHV2-26	-1.08034	2.19603	-9.32134	7.07605e-20	5.3041e-19	33.9271	DOWN
ADIPOQ	-1.28332	2.09609	-9.30811	7.93602e-20	5.93445e-19	33.8139	DOWN
OLFM4	-1.07315	1.42927	-9.2651	1.15123e-19	8.53064e-19	33.4465	DOWN
IGLV8-61	-1.25725	2.8287	-9.23988	1.43096e-19	1.05261e-18	33.2317	DOWN
SYT13	1.10338	1.94247	9.21716	1.73989e-19	1.27276e-18	33.0386	UP
CIDEC	-1.18602	1.79913	-9.21	1.85033e-19	1.35096e-18	32.9779	DOWN
KRT23	-1.11734	3.28082	-9.20525	1.92741e-19	1.40515e-18	32.9376	DOWN
DSCAM-AS1	1.08175	1.35239	9.20016	2.01348e-19	1.46633e-18	32.8944	UP
GPD1	-1.1789	2.00089	-9.18835	2.22818e-19	1.61925e-18	32.7944	DOWN
S100A8	-1.3016	2.74515	-9.16633	2.69054e-19	1.94783e-18	32.6082	DOWN
IGLV3-10	-1.24242	3.10447	-9.15178	3.04718e-19	2.19814e-18	32.4853	DOWN
IGHV1-69	-1.04956	2.12017	-9.06481	6.38846e-19	4.51165e-18	31.7546	DOWN
IGHV1-24	-1.16011	2.97842	-9.04463	7.57957e-19	5.33307e-18	31.5858	DOWN
COMP	1.07793	4.29346	9.00355	1.07245e-18	7.47839e-18	31.2432	UP
TRARG1	-1.01121	1.43416	-8.9538	1.62978e-18	1.12337e-17	30.8302	DOWN
KRT15	-1.2077	3.39464	-8.87516	3.14562e-18	2.13111e-17	30.1814	DOWN
COL10A1	1.08822	4.20165	8.49645	6.97615e-17	4.32319e-16	27.1255	UP
MSMB	1.11361	2.27111	8.42791	1.20767e-16	7.3604e-16	26.5847	UP
PLIN1	-1.18149	2.4557	-8.36385	2.01006e-16	1.21087e-15	26.0828	DOWN
CEACAM6	1.32488	3.37045	8.33752	2.47594e-16	1.48163e-15	25.8774	UP
IGHA2	-1.31036	5.5796	-8.21176	6.6507e-16	3.88828e-15	24.9043	DOWN
SLITRK6	1.03552	2.45283	8.16527	9.5515e-16	5.53703e-15	24.5479	UP
FABP4	-1.37726	4.00127	-7.85383	1.03223e-14	5.61921e-14	22.2059	DOWN
CLEC3A	1.39902	1.90089	7.70532	3.12307e-14	1.64377e-13	21.1175	UP
CPB1	1.49067	2.26314	7.60416	6.57032e-14	3.37985e-13	20.3867	UP
PIGR	-1.01418	2.22309	-7.54093	1.04145e-13	5.30011e-13	19.9342	DOWN
PLIN4	-1.0182	2.60387	-7.21142	1.08815e-12	5.18832e-12	17.6313	DOWN
NPY1R	1.03866	3.26155	6.74902	2.51141e-11	1.08357e-10	14.5566	UP
IGHG1	-1.16119	6.37081	-6.57309	7.90396e-11	3.29261e-10	13.4356	DOWN
MUCL1	-1.31909	3.88175	-6.28292	4.94179e-10	1.95039e-09	11.6461	DOWN
LTF	-1.02168	5.18587	-5.39188	8.69174e-08	2.91119e-07	6.62187	DOWN
